# Supplementary material
Source: PubMed Central journal article supplement (PMC8189652)

A.

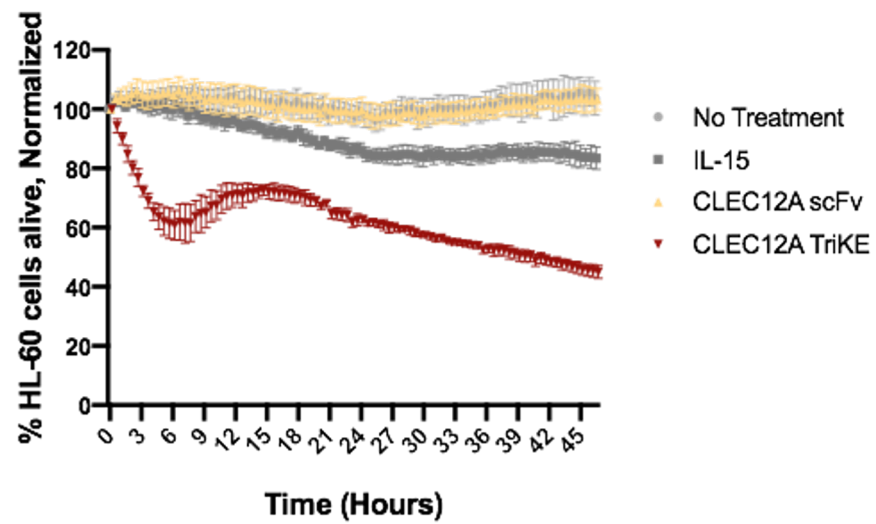

B.

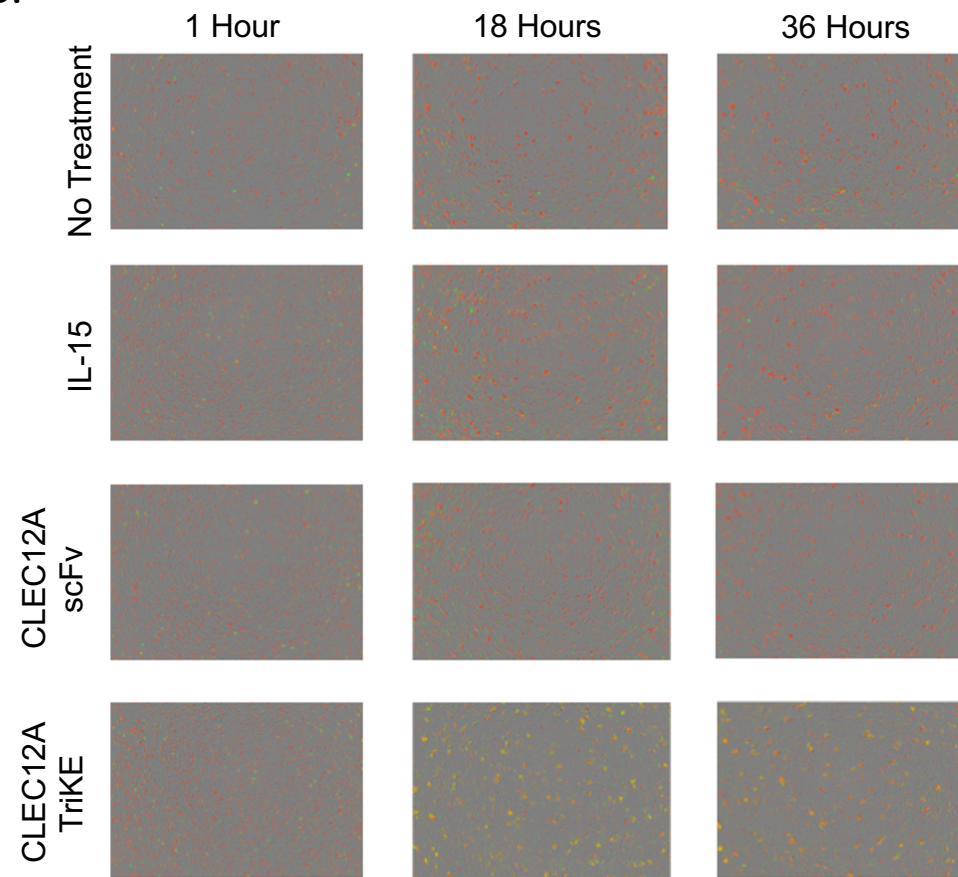

Supplement: NIHMS1636769-supplement-3.pdf [file NIHMS1636769-supplement-3.pdf]

A.

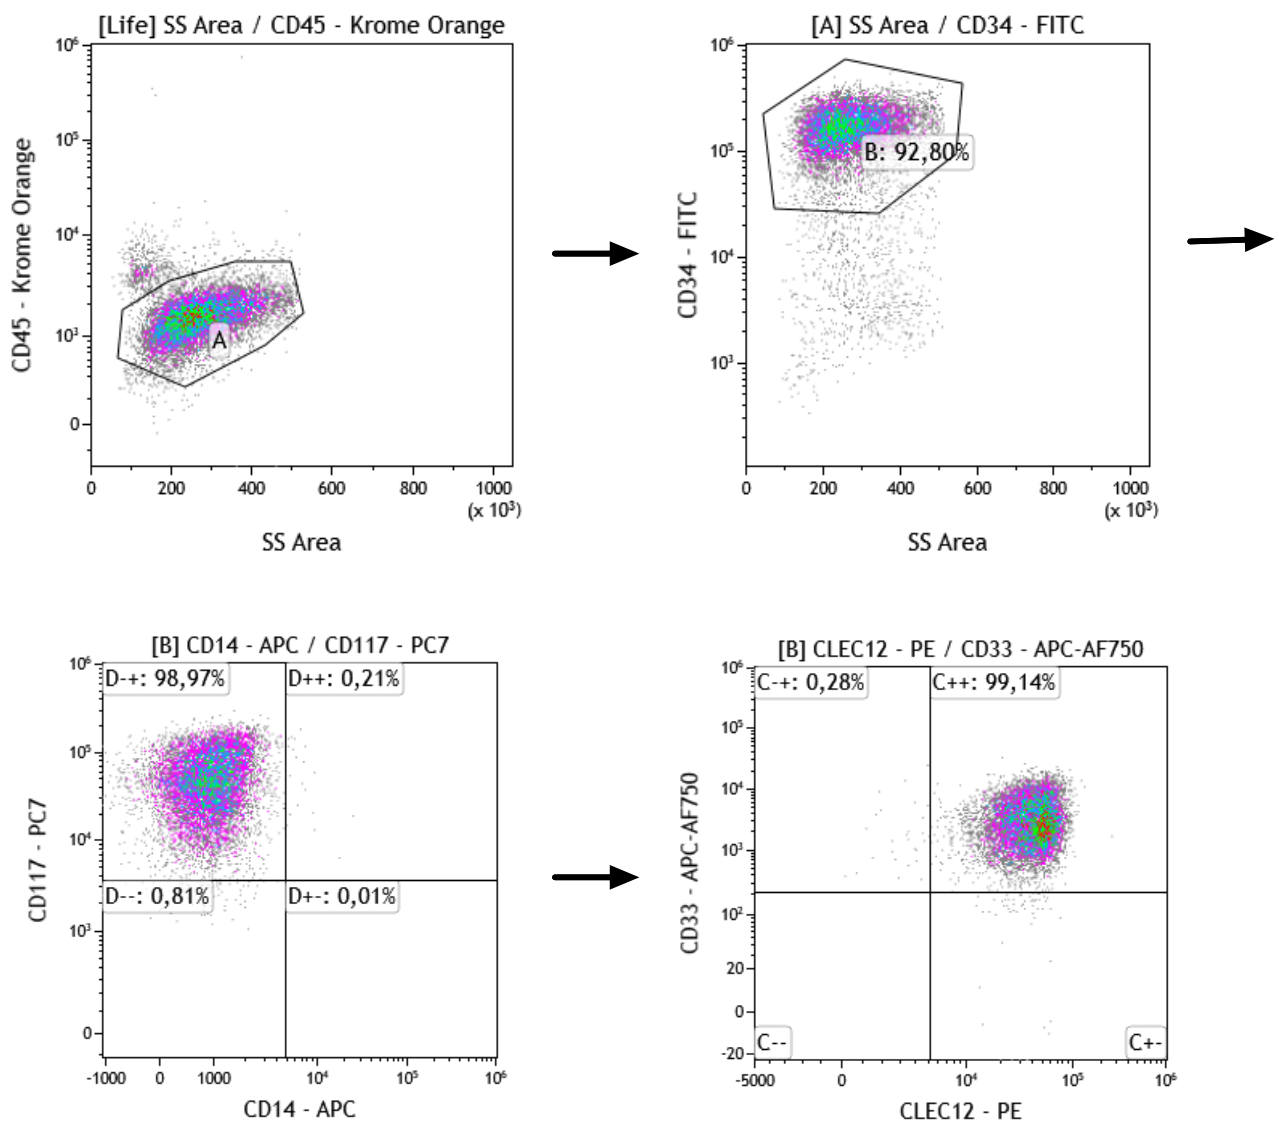

B.

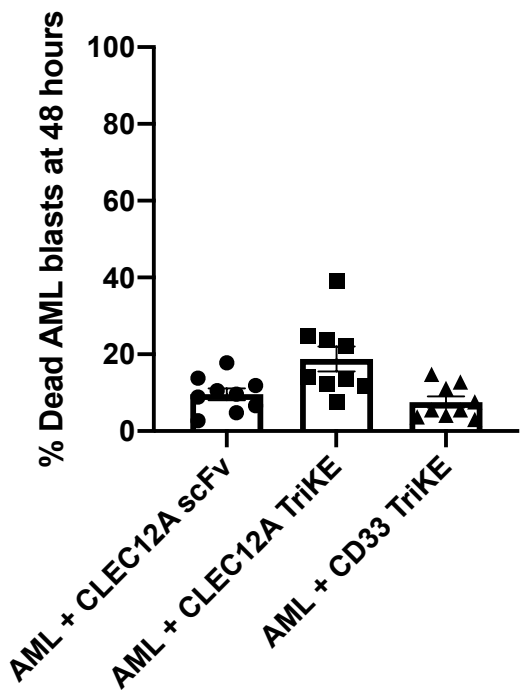

Supplement: NIHMS1636769-supplement-4.pdf [file NIHMS1636769-supplement-4.pdf]

A.

AML Blasts

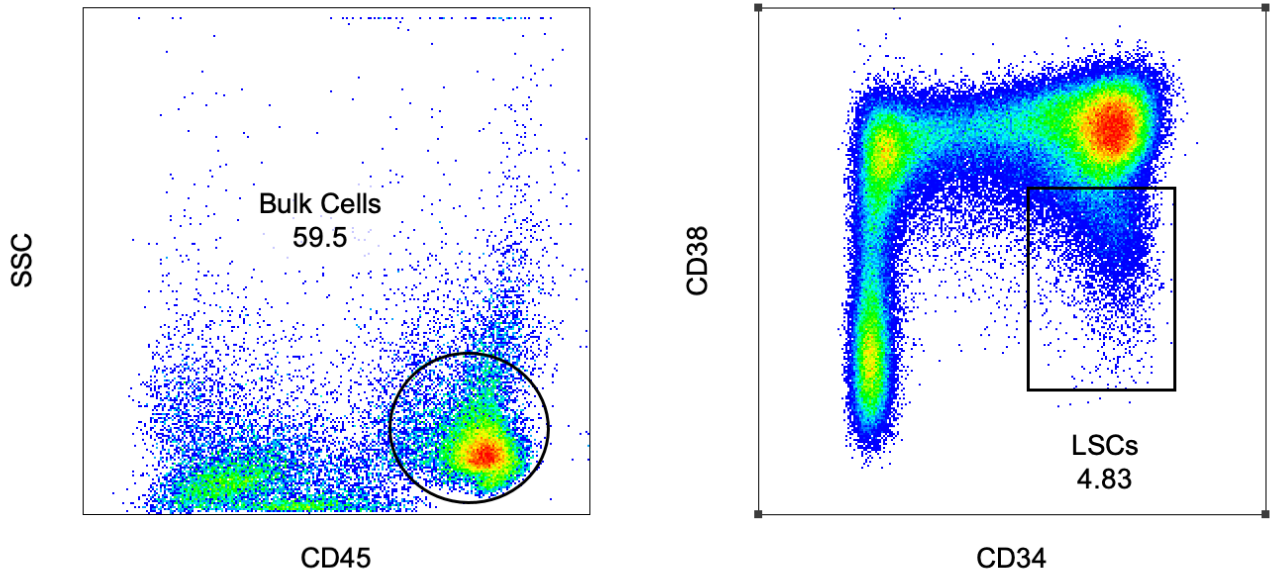

B.

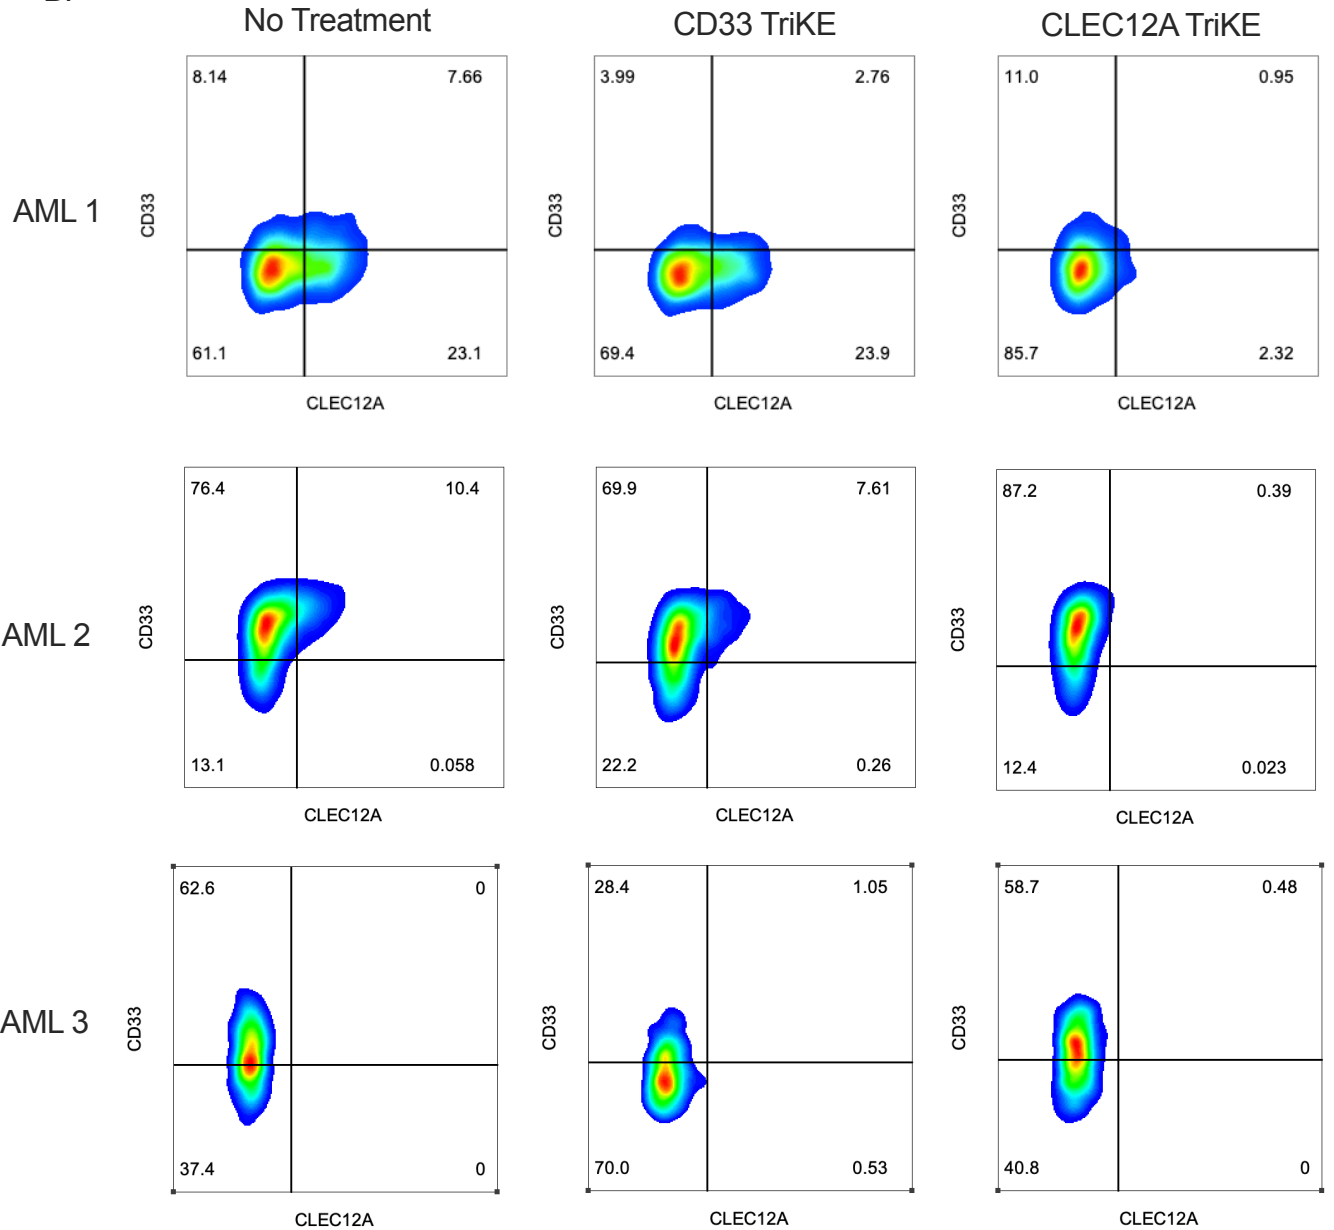

Supplement: NIHMS1636769-supplement-5.pdf [file NIHMS1636769-supplement-5.pdf]

A.

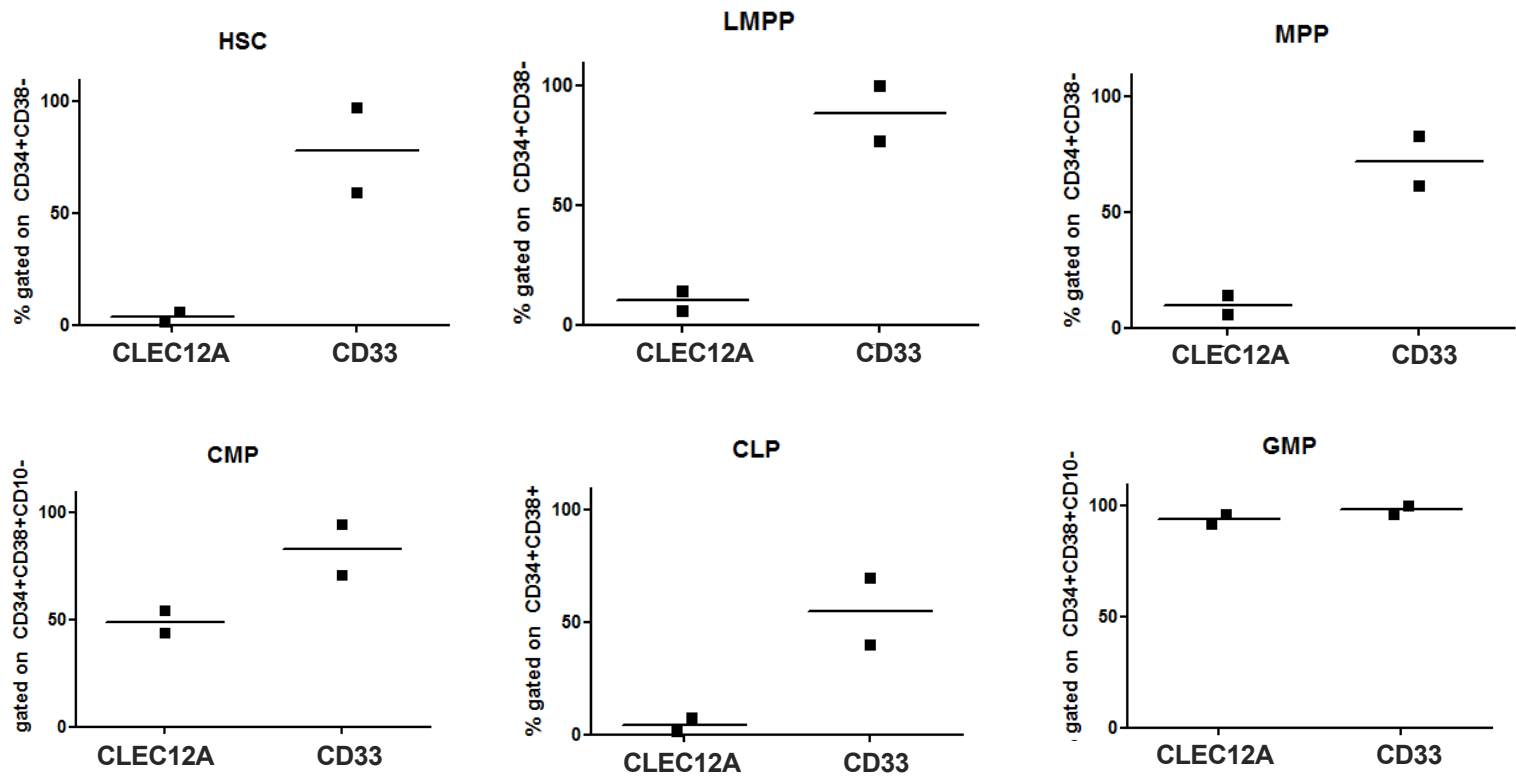

B.

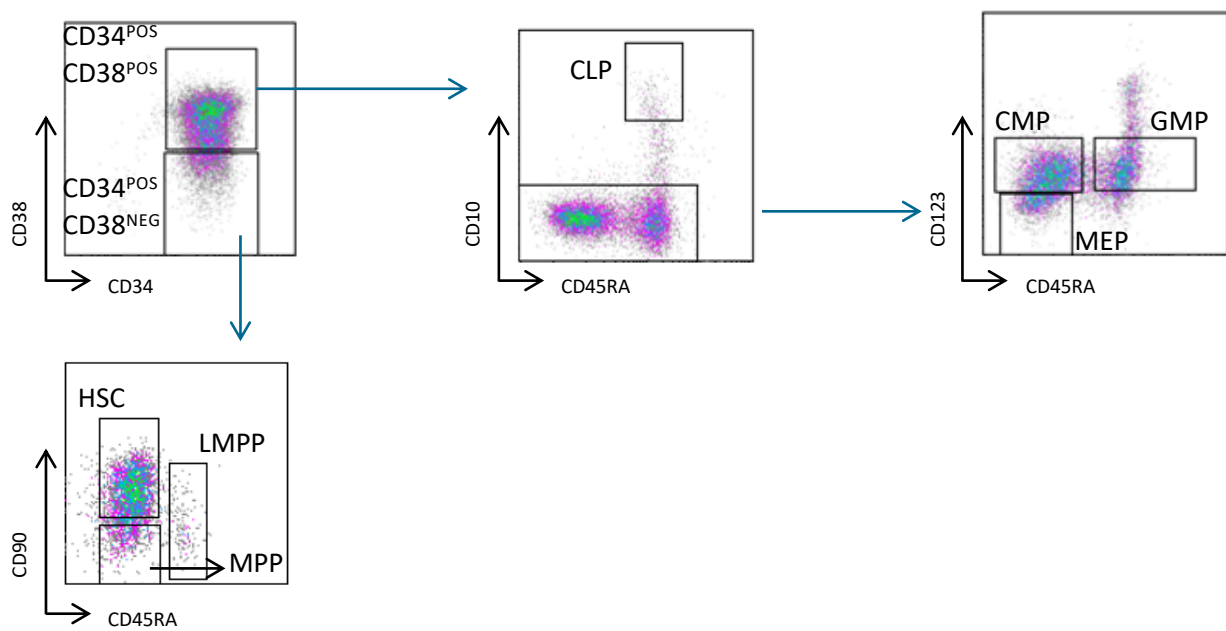

C.

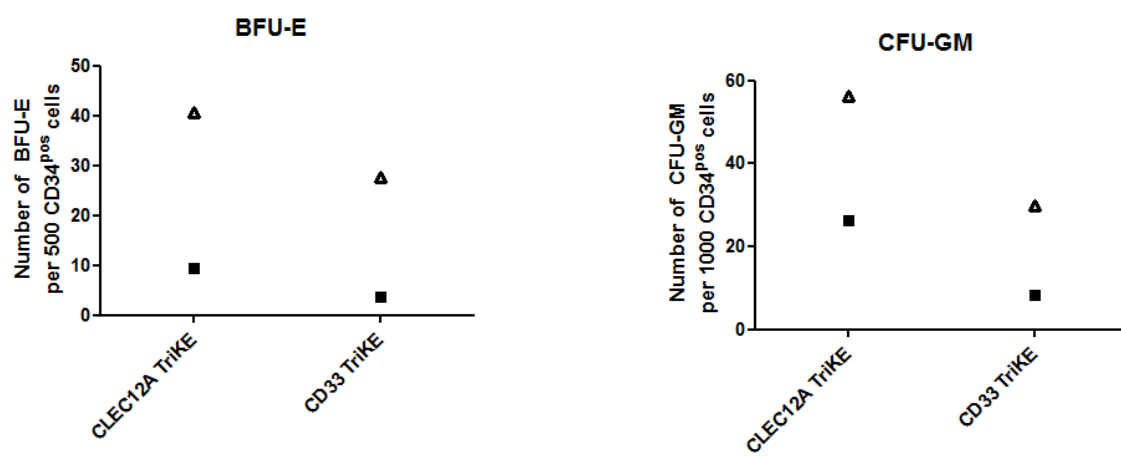

Supplement: NIHMS1636769-supplement-6.pdf [file NIHMS1636769-supplement-6.pdf]
